# Supplementary material for: Real-Time 3D Imaging and Inhibition Analysis of Various Amyloid Aggregations Using Quantum Dots
Source: PubMed Central journal article supplement (PMC7139405; doi:10.3390/ijms21061978), 2020-03-13
Supplement: ijms-21-01978-s001.pdf [file ijms-21-01978-s001.pdf]

## Supplemental Materials

### Supplemental Figures

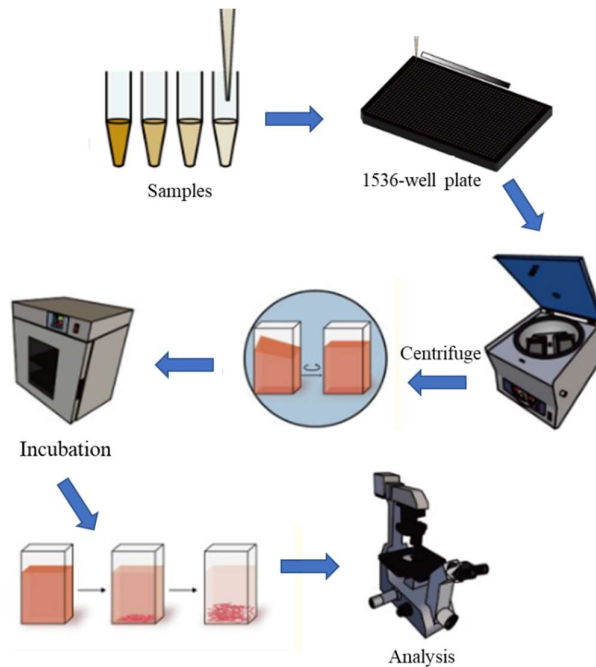

**Figure S1.** A flow diagram of the microliter-scale high-throughput screening system. Amyloid proteins are mixed with various concentration of inhibitors in a 1536-well plate. After incubation, they are imaged by fluorescence microscopy and the  $EC_{50}$  is calculated from fluorescence images.

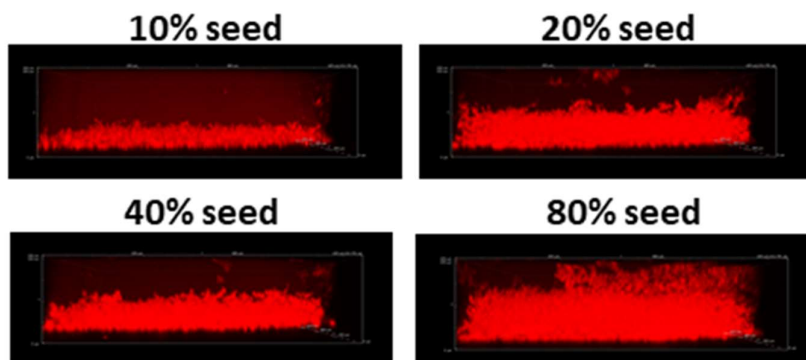

**Figure S2.** 10  $\mu$ M  $\alpha$ -synuclein aggregations with different seed concentrations. The percentage indicates the content of seed relative to the monomer concentration. 3D images were captured by a confocal microscope after incubation for 216 h.
